# Supplementary material for: Injectable pH and redox dual responsive hydrogels based on self-assembled peptides for anti-tumor drug delivery
Source: Royal Society of Chemistry journal article supplement (doi:10.1039/d0bm01004a), 2020-01-01
Supplement: d0bm01004a1.pdf [file d0bm01004a1.pdf]

## **Supplementary Figures and data**

### **Injectable pH and redox dual responsive hydrogel based on self-assembled peptides for anti-tumor drug delivery**

Ying Zhu<sup>a</sup>, Liying Wang<sup>b</sup>, Yiping Li<sup>a</sup>, Zhewei Huang<sup>a</sup>, Shiyao Luo<sup>a</sup>, Han Han<sup>a</sup>, Yue He<sup>a</sup>, Faisal Raza<sup>a</sup>, Jun Wu<sup>b\*</sup>, and Liang Ge<sup>a\*</sup>

<sup>a</sup> *State Key Laboratory of Natural Medicines, China Pharmaceutical University, No.24 Tongjia Xiang, Nanjing, 210009, China*

<sup>b</sup> *Key Laboratory of Sensing Technology and Biomedical Instrument of Guangdong Province, School of Biomedical Engineering, Sun Yat-sen University, Guangzhou 510006, China*

\* Corresponding authors. E-mail address: wujun29@mail.sysu.edu.cn (J. Wu), geliang1981@hotmail.com (Liang Ge)

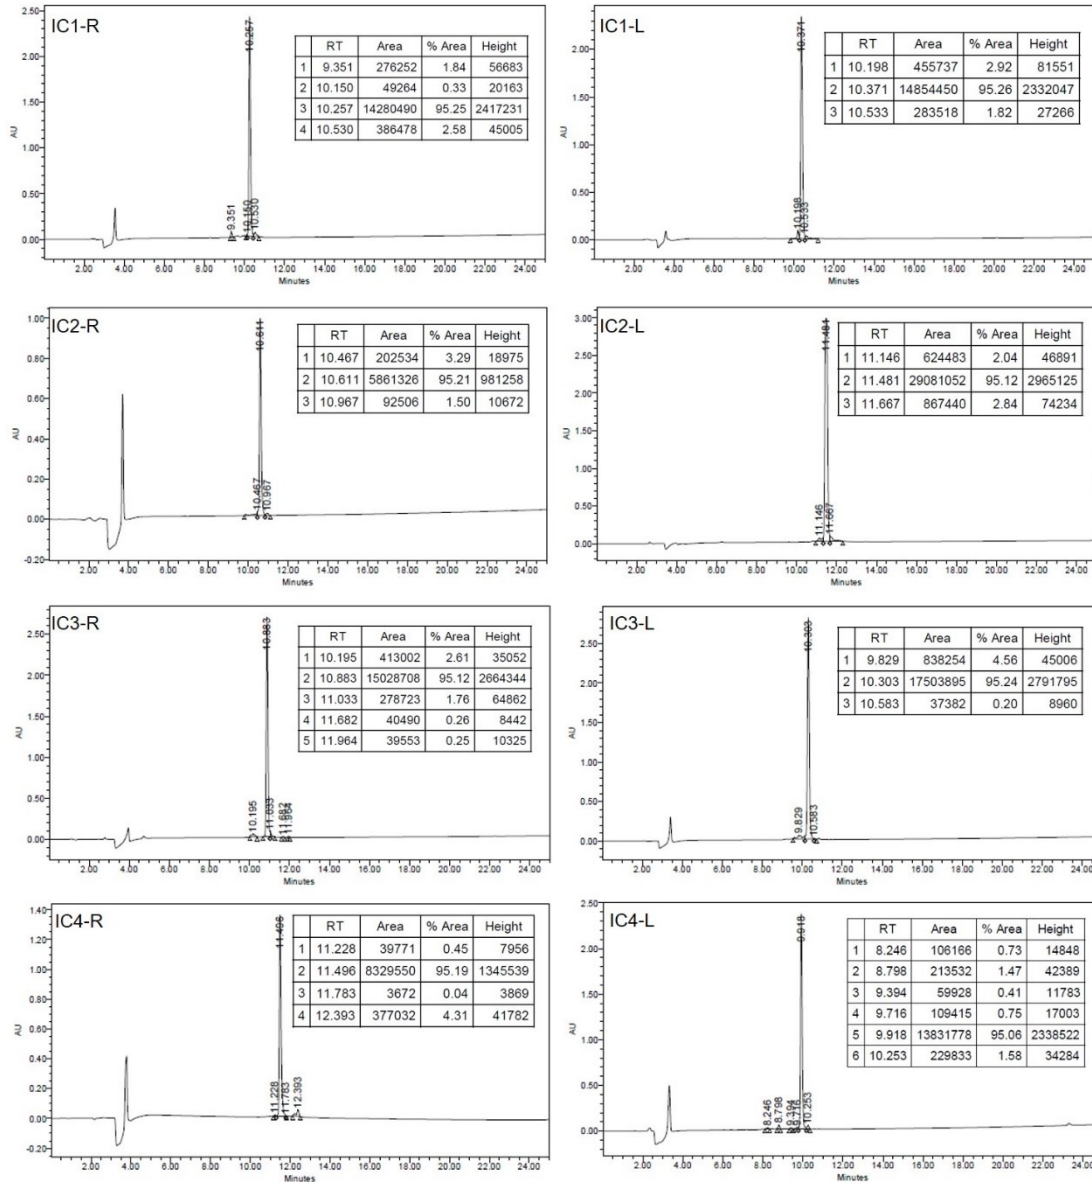

**Fig. S1.** The UHPLC chromatograms and peak data of designed peptides.

The purity of IC1-R, IC1-L, IC2-R, IC2-L, IC3-R, IC3-L, IC4-R and IC4-L were 95.25%, 95.26%, 95.21%, 95.12%, 95.12%, 95.24%, 95.19% and 95.06%, respectively, according to the uplc-hplc and peak data of the eight peptides, which all met the purity requirements of hydrogel preparation and evaluation in the later stage.

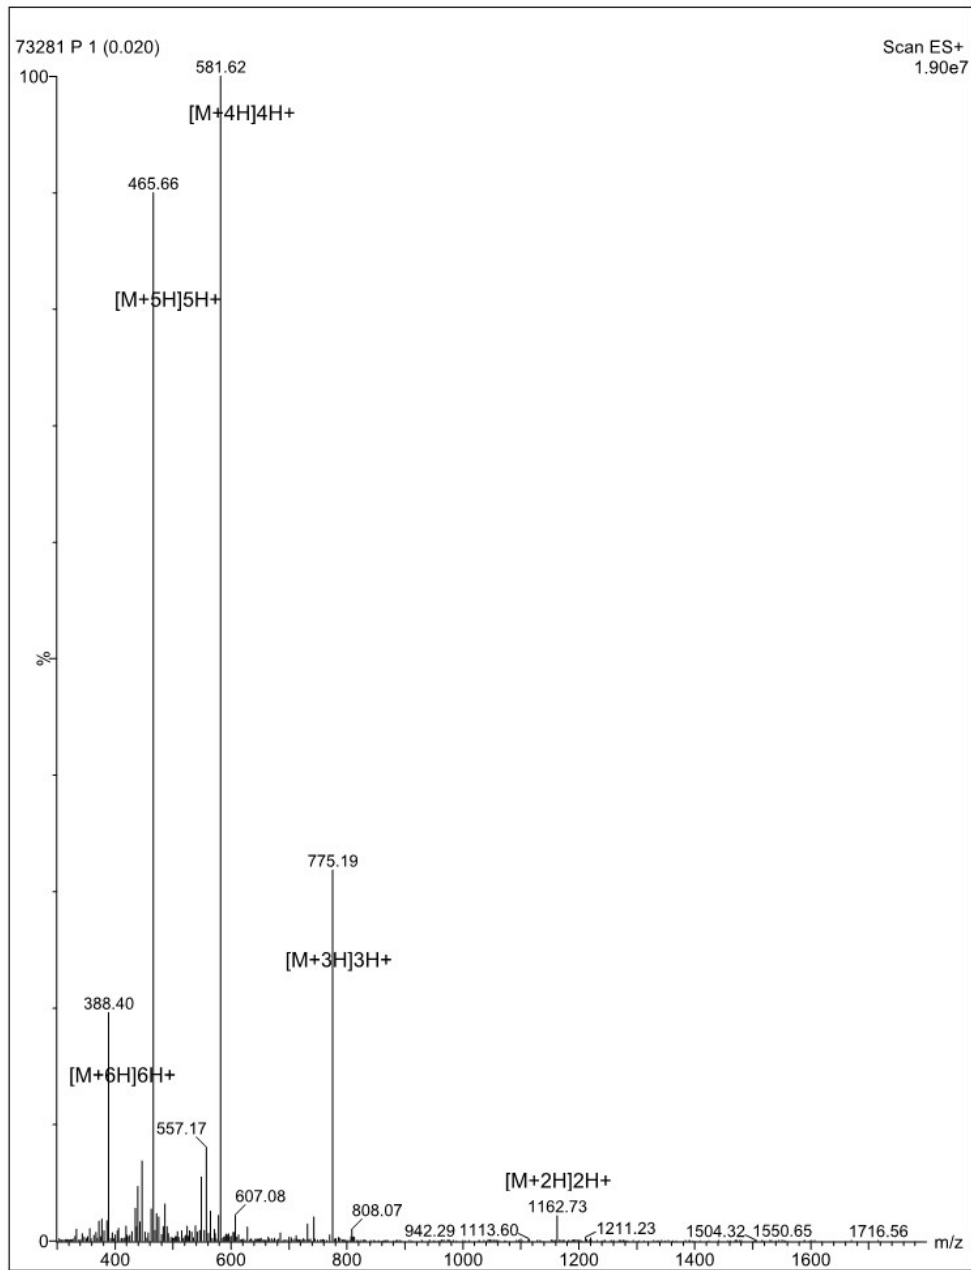

**Fig. S2.** The mass spectrum of IC1-R peptide.

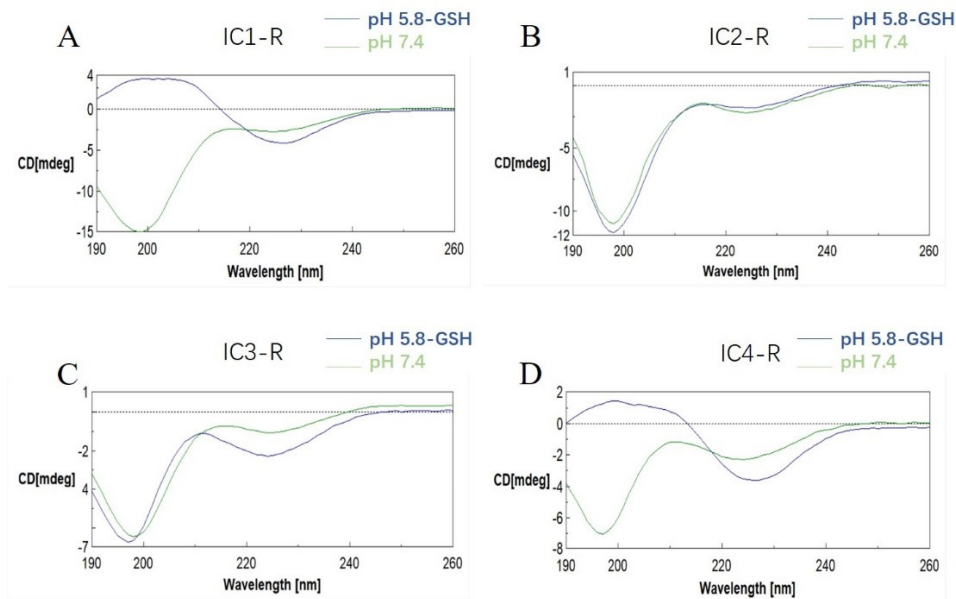

**Fig. S3.** Circular dichroism spectrum of IC1-R (A), IC2-R (B), IC3-R (C), and IC4-R (D) in different buffer solution

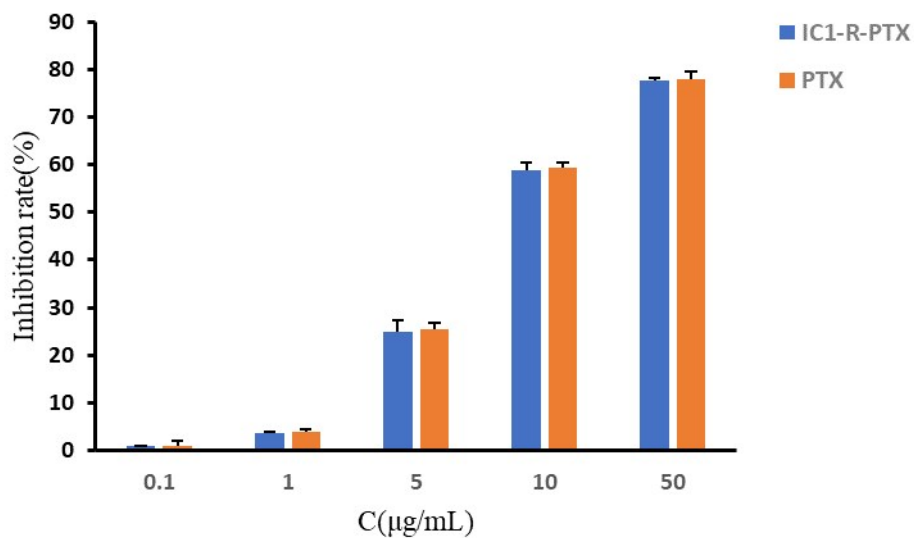

**Fig. S4** The cell inhibition rate of drug-loaded peptide hydrogel and free PTX (n=5)

**Table S1**

Mass spectrometry confirmation of IC1-R peptide.

| Peptide | Molecular weight | Theoretical value | Measured value |
|---------|------------------|-------------------|----------------|
|---------|------------------|-------------------|----------------|

|       |         |                                |                                |
|-------|---------|--------------------------------|--------------------------------|
|       |         | [M+2H] <sup>2+</sup> : 1162.09 | [M+2H] <sup>2+</sup> : 1162.73 |
|       |         | [M+3H] <sup>3+</sup> : 775.06  | [M+3H] <sup>3+</sup> : 775.19  |
| IC1-R | 2322.17 | [M+4H] <sup>4+</sup> : 581.54  | [M+4H] <sup>4+</sup> : 581.62  |
|       |         | [M+5H] <sup>5+</sup> : 465.43  | [M+5H] <sup>5+</sup> : 465.66  |
|       |         | [M+6H] <sup>6+</sup> : 388.03  | [M+6H] <sup>6+</sup> : 388.40  |

**Table S2**

Gelation of different concentrations of IC peptides (VL: the time peptide solution began to be viscous liquid; SG: the time of stable gel formation; UG: unable to form a stable gel).

| Peptide | Concentration of peptide(mg/mL) |                         |                         |                         |                         |
|---------|---------------------------------|-------------------------|-------------------------|-------------------------|-------------------------|
|         | 10                              | 15                      | 20                      | 25                      | 30                      |
| IC1-R   | VL:5 min;<br>SG:10 min          | VL:1 min;<br>SG:7 min   | VL:1 min;<br>SG:5 min   | Gelation instantly      | Gelation instantly      |
| IC1-L   | VL:7 min;<br>SG:20 min          | VL:3 min;<br>SG:13 min  | VL:3 min;<br>SG:12 min  | VL:2 min;<br>SG:12 min  | VL:1 min;<br>SG:8 min   |
| IC2-R   | UG                              | UG                      | UG                      | UG                      | UG                      |
| IC2-L   | UG                              | UG                      | UG                      | UG                      | UG                      |
| IC3-R   | UG                              | UG                      | UG                      | UG                      | UG                      |
| IC3-L   | UG                              | UG                      | UG                      | UG                      | UG                      |
| IC4-R   | UG                              | VL:16 min;<br>SG:25 min | VL:10 min;<br>SG:20 min | VL:7 min;<br>SG:18 min  | VL:6 min;<br>SG:15 min  |
| IC4-L   | UG                              | VL:28 min;<br>SG:40 min | VL:28 min;<br>SG:38 min | VL:23 min;<br>SG:31 min | VL:15 min;<br>SG:25 min |

**Table S3**

Gelation of peptides under different pH (VL: the time peptide solution began to be viscous liquid;

SG: the time of stable gel formation; UG: unable to form a stable gel).

| Peptide | pH  |                         |                        |                         |
|---------|-----|-------------------------|------------------------|-------------------------|
|         | 6.4 | 7.4                     | 8.5                    | 9.2                     |
| IC1-R   | UG  | VL:1 min;<br>SG:7 min   |                        |                         |
| IC1-L   | UG  | VL:3 min;<br>SG:13 min  |                        |                         |
| IC2-R   | UG  | UG                      | VL:2 min;<br>SG:30 min |                         |
| IC2-L   | UG  | UG                      | VL:3 min;<br>SG:41 min |                         |
| IC3-R   | UG  | UG                      | UG                     | VL:13 min;<br>SG:25 min |
| IC3-L   | UG  | UG                      | UG                     | VL:17 min;<br>SG:34 min |
| IC4-R   | UG  | VL:16 min;<br>SG:25 min |                        |                         |
| IC4-L   | UG  | VL:28 min;<br>SG:40 min |                        |                         |

**Table S4**

Secondary conformation ratios of IC peptides in different buffer solution.

| Peptide            | $\alpha$ | $\beta$ | Turn | Random |
|--------------------|----------|---------|------|--------|
| IC1-R (pH 7.4)     | 0        | 63.4    | 14.8 | 21.8   |
| IC1-R (pH 5.8-GSH) | 0        | 9.7     | 23.1 | 67.2   |
| IC2-R (pH 7.4)     | 0        | 10.3    | 24.9 | 64.8   |
| IC2-R (pH 5.8-GSH) | 0        | 10.9    | 23.6 | 65.5   |
| IC3-R (pH 7.4)     | 0        | 9.9     | 24.0 | 66.1   |
| IC3-R (pH 5.8-GSH) | 0        | 10.1    | 26.3 | 63.6   |
| IC4-R (pH 7.4)     | 0        | 56.6    | 17.1 | 26.3   |
| IC4-R (pH 5.8-GSH) | 0        | 11.3    | 21.7 | 67.0   |

**Table S5**IC<sub>50</sub> of PTX and IC1-R-PTX.

| Group                                 | PTX   | IC1-R-PTX |
|---------------------------------------|-------|-----------|
| IC <sub>50</sub> ( $\mu\text{g/mL}$ ) | 8.231 | 8.477     |
